# Supplementary material
Source: Elsevier journal article supplement (https://comptes-rendus.academie-sciences.fr/chimie/article/10.1016/j.crci.2012.05.012/file/attach/mmc1.pdf)
Supplement: mmc1 [file mmc1.pdf]

## checkCIF/PLATON (standard)

You have not supplied any structure factors. As a result the full set of tests cannot be run.

No syntax errors found.  
Please wait while processing ....

CIF dictionary  
Interpreting this report

## Datablock: 517r

Bond precision: C-C = 0.0172 A Wavelength=0.71073  
Cell: a=10.83(2) b=13.90(3) c=13.90(3)  
alpha=79.27(2) beta=70.73(2) gamma=70.73(2)  
Temperature: 297 K

|                | Calculated            | Reported              |
|----------------|-----------------------|-----------------------|
| Volume         | 1858(7)               | 1859(6)               |
| Space group    | P -1                  | P-1                   |
| Hall group     | -P 1                  | -P 1                  |
| Moiety formula | C21 H24 Ag4 F12 N3 O9 | C21 H24 Ag4 F12 N3 O9 |
| Sum formula    | C21 H24 Ag4 F12 N3 O9 | C21 H24 Ag4 F12 N3 O9 |
| Mr             | 1121.91               | 1121.91               |
| Dx,g cm-3      | 2.005                 | 2.004                 |
| Z              | 2                     | 2                     |
| Mu (mm-1)      | 2.181                 | 2.180                 |
| F000           | 1078.0                | 1078.0                |
| F000'          | 1071.54               |                       |
| h, k, lmax     | 12, 16, 16            | 12, 16, 16            |
| Nref           | 6550                  | 6486                  |
| Tmin, Tmax     | 0.514, 0.633          | 0.551, 0.657          |
| Tmin'          | 0.504                 |                       |

Correction method= MULTI-SCAN  
Data completeness= 0.990 Theta(max)= 25.000  
R(reflections)= 0.0616( 4943) wR2(reflections)= 0.1367( 6486)  
S = 1.092 Npar= 573

The following ALERTS were generated. Each ALERT has the format  
**test-name\_ALERT\_alert-type\_alert-level.**  
Click on the hyperlinks for more details of the test.

### Alert level B

|                   |                     |                                  |      |       |
|-------------------|---------------------|----------------------------------|------|-------|
| PLAT213_ALERT_2_B | Atom F7B            | has ADP max/min Ratio .....      | 4.1  | prola |
| PLAT220_ALERT_2_B | Large Non-Solvent C | Ueq(max)/Ueq(min) ...            | 5.3  | Ratio |
| PLAT241_ALERT_2_B | Check High          | Ueq as Compared to Neighbors for | O7   |       |
| PLAT242_ALERT_2_B | Check Low           | Ueq as Compared to Neighbors for | C14  |       |
| PLAT242_ALERT_2_B | Check Low           | Ueq as Compared to Neighbors for | C16  |       |
| PLAT242_ALERT_2_B | Check Low           | Ueq as Compared to Neighbors for | C18  |       |
| PLAT242_ALERT_2_B | Check Low           | Ueq as Compared to Neighbors for | C20  |       |
| PLAT732_ALERT_1_B | Angle Calc          | 70.63(3), Rep 70.63(13) .....    | 4.33 | su-Ra |
|                   | AG3 -AG2 -AG1       | 1.555 1.555 1.555 #              | 27   |       |

### Alert level C

|                   |                            |                                  |        |       |
|-------------------|----------------------------|----------------------------------|--------|-------|
| PLAT148_ALERT_3_C | su on the                  | a - Axis is (Too) Large .....    | 0.020  | Ang.  |
| PLAT148_ALERT_3_C | su on the                  | b - Axis is (Too) Large .....    | 0.030  | Ang.  |
| PLAT148_ALERT_3_C | su on the                  | c - Axis is (Too) Large .....    | 0.030  | Ang.  |
| PLAT213_ALERT_2_C | Atom F8                    | has ADP max/min Ratio .....      | 3.6    | prola |
| PLAT213_ALERT_2_C | Atom C22                   | has ADP max/min Ratio .....      | 3.4    | oblat |
| PLAT213_ALERT_2_C | Atom F2                    | has ADP max/min Ratio .....      | 3.4    | prola |
| PLAT213_ALERT_2_C | Atom F5                    | has ADP max/min Ratio .....      | 3.4    | prola |
| PLAT213_ALERT_2_C | Atom F6                    | has ADP max/min Ratio .....      | 3.6    | prola |
| PLAT213_ALERT_2_C | Atom F8B                   | has ADP max/min Ratio .....      | 3.6    | prola |
| PLAT222_ALERT_3_C | Large Non-Solvent H        | Uiso(max)/Uiso(min) ..           | 6.0    | Ratio |
| PLAT232_ALERT_2_C | Hirshfeld Test Diff (M-X)  | Ag1 -- N1 ..                     | 5.5    | su    |
| PLAT232_ALERT_2_C | Hirshfeld Test Diff (M-X)  | Ag2 -- O9 ..                     | 5.4    | su    |
| PLAT234_ALERT_4_C | Large Hirshfeld Difference | O9 -- C21 ..                     | 0.24   | Ang.  |
| PLAT241_ALERT_2_C | Check High                 | Ueq as Compared to Neighbors for | Ag1    |       |
| PLAT241_ALERT_2_C | Check High                 | Ueq as Compared to Neighbors for | O1     |       |
| PLAT241_ALERT_2_C | Check High                 | Ueq as Compared to Neighbors for | O2     |       |
| PLAT242_ALERT_2_C | Check Low                  | Ueq as Compared to Neighbors for | Ag2    |       |
| PLAT242_ALERT_2_C | Check Low                  | Ueq as Compared to Neighbors for | Ag3    |       |
| PLAT242_ALERT_2_C | Check Low                  | Ueq as Compared to Neighbors for | N1     |       |
| PLAT242_ALERT_2_C | Check Low                  | Ueq as Compared to Neighbors for | N2     |       |
| PLAT242_ALERT_2_C | Check Low                  | Ueq as Compared to Neighbors for | C13    |       |
| PLAT242_ALERT_2_C | Check Low                  | Ueq as Compared to Neighbors for | C15    |       |
| PLAT242_ALERT_2_C | Check Low                  | Ueq as Compared to Neighbors for | C17    |       |
| PLAT242_ALERT_2_C | Check Low                  | Ueq as Compared to Neighbors for | C19    |       |
| PLAT242_ALERT_2_C | Check Low                  | Ueq as Compared to Neighbors for | C21    |       |
| PLAT342_ALERT_3_C | Low Bond Precision on      | C-C Bonds .....                  | 0.0172 | Ang   |
| PLAT360_ALERT_2_C | Short C(sp3)-C(sp3) Bond   | C21 - C22 ...                    | 1.39   | Ang.  |

---

## ● Alert level G

|                   |                                                  |              |
|-------------------|--------------------------------------------------|--------------|
| PLAT003_ALERT_2_G | Number of Uiso or Uij Restrained Atom Sites .... | 1            |
| PLAT004_ALERT_5_G | Info: Polymeric Structure Found with Dimension . | 1            |
| PLAT005_ALERT_5_G | No _iucr_refine_instructions_details in CIF .... | ?            |
| PLAT154_ALERT_1_G | The su's on the Cell Angles are Equal .....      | 0.02000 Deg. |
| PLAT301_ALERT_3_G | Note: Main Residue Disorder .....                | 29 Perc.     |
| PLAT811_ALERT_5_G | No ADDSYM Analysis: Too Many Excluded Atoms .... | !            |
| PLAT860_ALERT_3_G | Note: Number of Least-Squares Restraints .....   | 6            |

---

0 **ALERT level A** = Most likely a serious problem - resolve or explain  
8 **ALERT level B** = A potentially serious problem, consider carefully  
27 **ALERT level C** = Check. Ensure it is not caused by an omission or oversight  
7 **ALERT level G** = General information/check it is not something unexpected

2 ALERT type 1 CIF construction/syntax error, inconsistent or missing data  
29 ALERT type 2 Indicator that the structure model may be wrong or deficient  
7 ALERT type 3 Indicator that the structure quality may be low  
1 ALERT type 4 Improvement, methodology, query or suggestion  
3 ALERT type 5 Informative message, check

---

It is advisable to attempt to resolve as many as possible of the alerts in all categories. Often the minor alerts point to easily fixed oversights, errors and omissions in your CIF or refinement strategy, so attention to these fine details can be worthwhile. In order to resolve some of the more serious problems it may be necessary to carry out additional measurements or structure refinements. However, the purpose of your study may justify the reported deviations and the more serious of these should normally be commented upon in the discussion or experimental section of a paper or in the "special\_details" fields of the CIF. checkCIF was carefully designed to identify outliers and unusual parameters, but every test has its limitations and alerts that are not important in a particular case may appear. Conversely, the absence of alerts does not guarantee there are no aspects of the results needing attention. It is up to the individual to critically assess their own results and, if necessary, seek expert advice.

### Publication of your CIF in IUCr journals

A basic structural check has been run on your CIF. These basic checks will be run on all CIFs submitted for publication in IUCr journals (*Acta Crystallographica*, *Journal of Applied Crystallography*, *Journal of Synchrotron Radiation*); however, if you intend to submit to *Acta Crystallographica Section C* or *E*, you should make sure that [full publication checks](#) are run on the final version of your CIF prior to submission.

### Publication of your CIF in other journals

Please refer to the *Notes for Authors* of the relevant journal for any special instructions relating to CIF submission.

---

PLATON version of 18/07/2011; check.def file version of 04/07/2011

## Datablock 517r - ellipsoid plot

53 Y

NOMOVE FORCED

Prob = 50  
Temp = 297

180711)

Download CIF editor (pubCIF) from the IUCr  
Download CIF editor (enCIFer) from the CCDC  
Test a new CIF entry

PLATON-Oct 20 08:08:53 2011

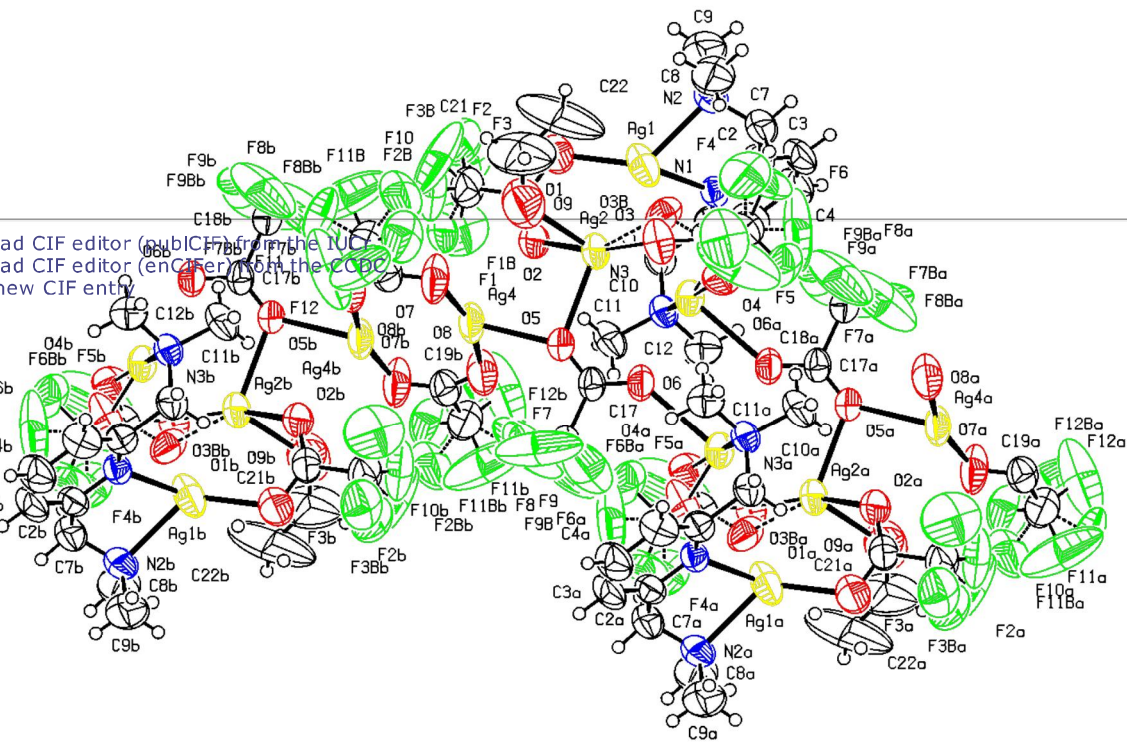

Z 153

517r

P-1

R = 0.06

RES= 0 -50 X
